# Supplementary material
Source: PubMed Central journal article supplement (PMC2034267)

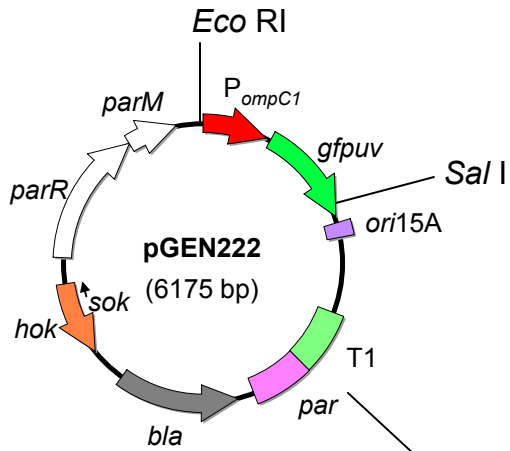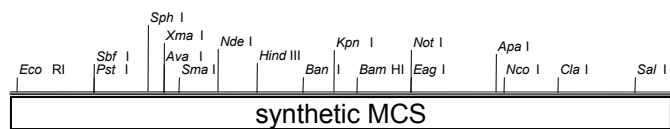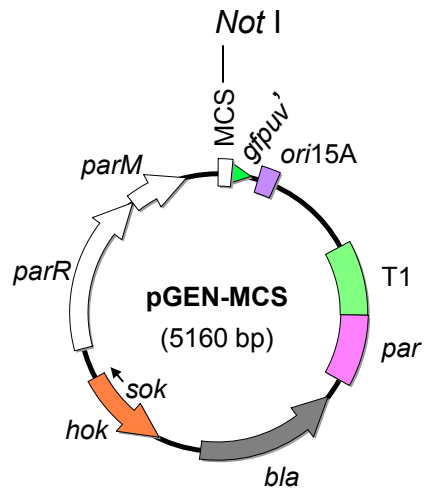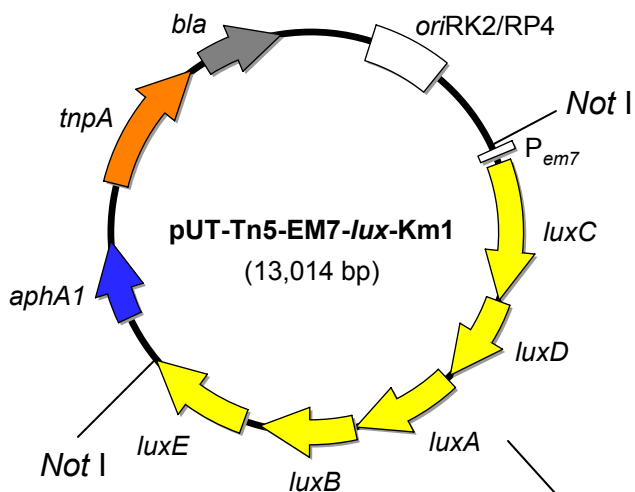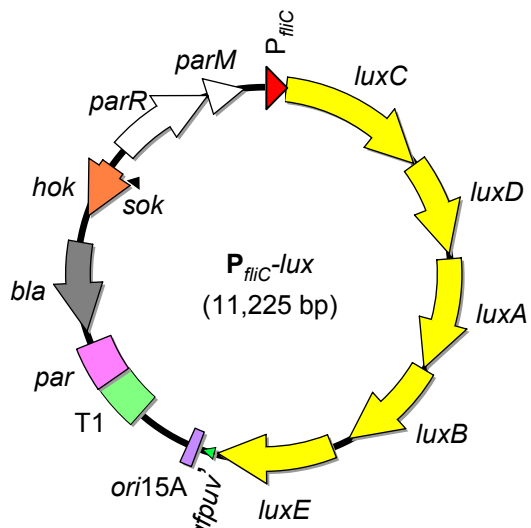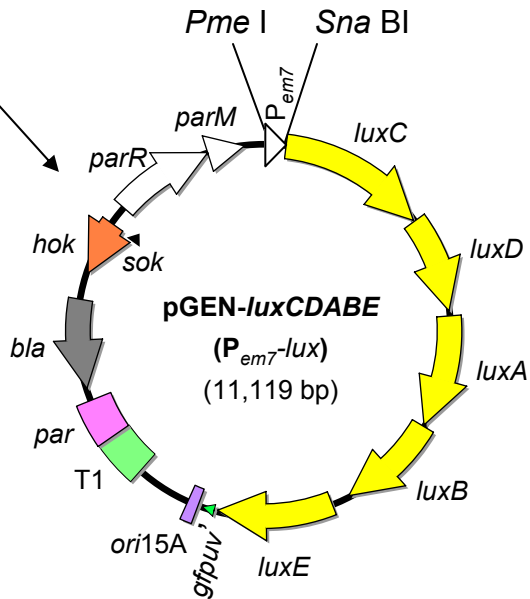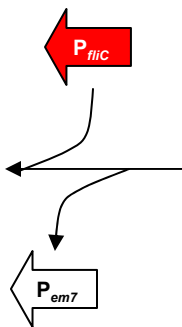

Supplement: pnas_0607898104_1.pdf [file pnas_0607898104_1.pdf]

# Loss of $P_{em7-lux}$ Over Time (*in vitro*)

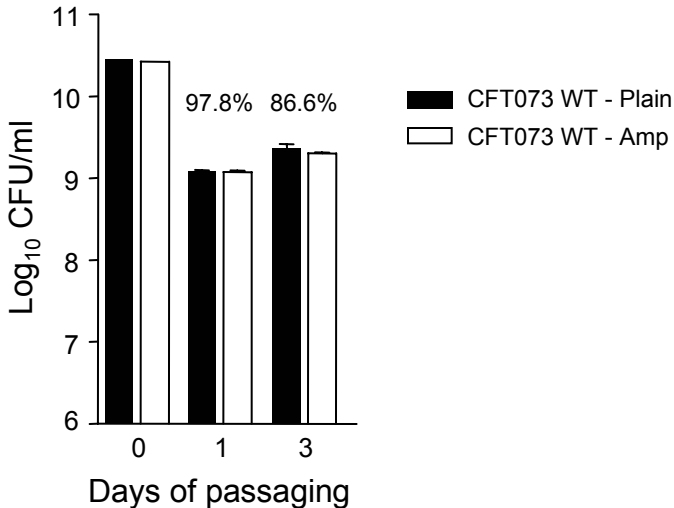

Supplement: pnas_0607898104_2.pdf [file pnas_0607898104_2.pdf]

ventral

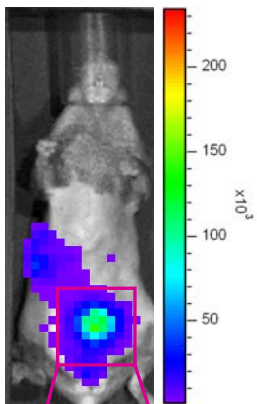

right  
lateral

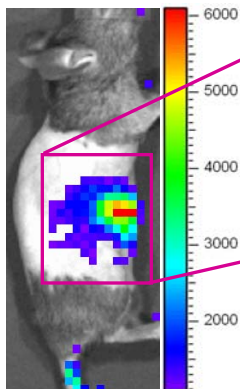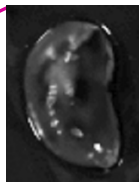

mince

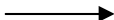

right kidney  
*ex vivo*

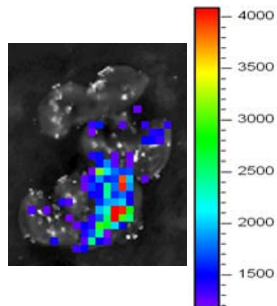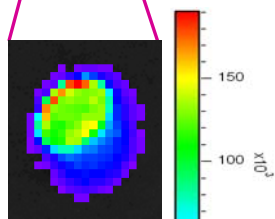

bladder  
*ex vivo*

Supplement: pnas_0607898104_3.pdf [file pnas_0607898104_3.pdf]
